# Supplementary material for: Spatial control of upconversion emission in a single fluoride microcrystalviathe excitation mode and native interference effect
Source: Royal Society of Chemistry journal article supplement (doi:10.1039/c7tc05032a), 2017-12-18
Supplement: c7tc05032a1.pdf [file c7tc05032a1.pdf]

## Supporting Information

### **Spatial control of upconversion emission in a single fluoride microcrystal via excitation mode and native interference effect**

Dangli Gao,<sup>\*a,b</sup> Dan Wang,<sup>a</sup> Xiangyu Zhang,<sup>c</sup> Xiaojuan Feng,<sup>a</sup> Hong Xin,<sup>a</sup> Sining Yun<sup>d</sup> and Dongping Tian<sup>a\*</sup>

<sup>a</sup>College of Science, Xi'an University of Architecture and Technology, Xi'an, Shaanxi 710055, China

<sup>b</sup>Shaanxi Key Laboratory of Nano Materials and Technology, Xi'an, Shaanxi 710055, China

<sup>c</sup>College of Science, Chang'an University, Xi'an, Shaanxi 710064, China

<sup>d</sup>College of Materials and Mineral Resources, Xi'an University of Architecture and Technology, Xi'an, Shaanxi 710055, China

\*Correspondence: D Gao, Email: [gaodangli@163.com](mailto:gaodangli@163.com); D Tian, Email: [dptian@xauat.edu.cn](mailto:dptian@xauat.edu.cn)

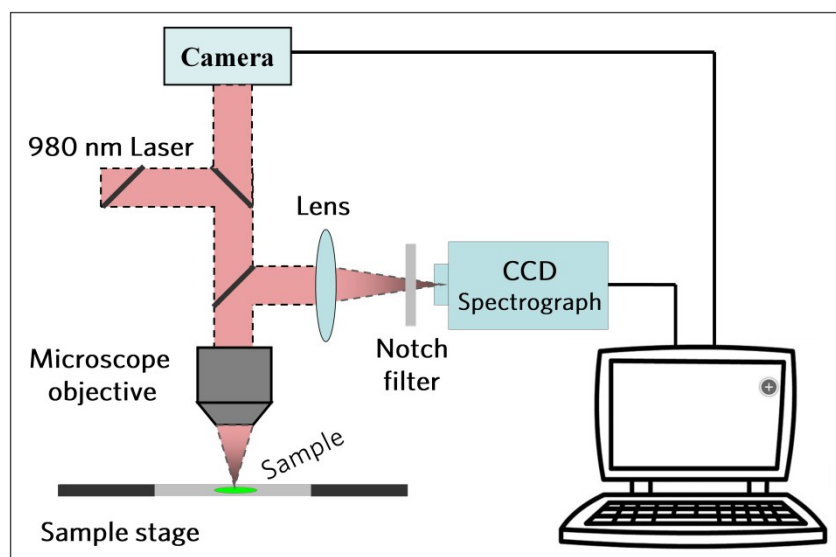

Fig. S1 Confocal microscopy system to measure the spectra of a single micro-particle. Note that the inclination of the loading platform can be adjusted continuously by the screws on the bottom.

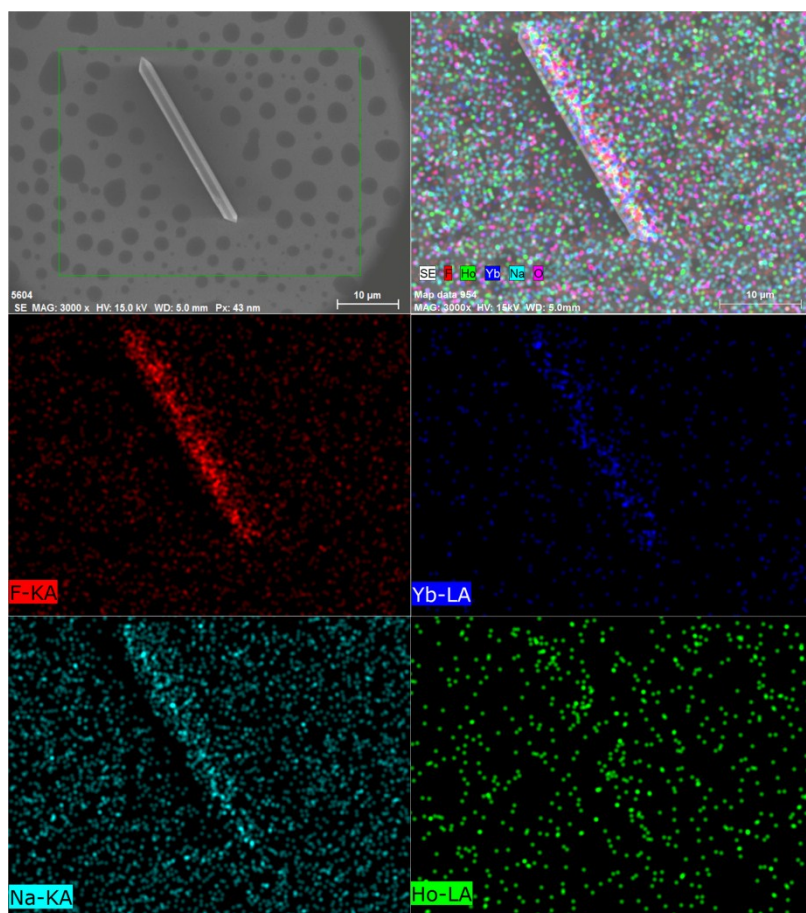

Fig. S2 Element mapping of the  $\text{NaYbF}_4: \text{Ho}^{3+}$  microcrystals.

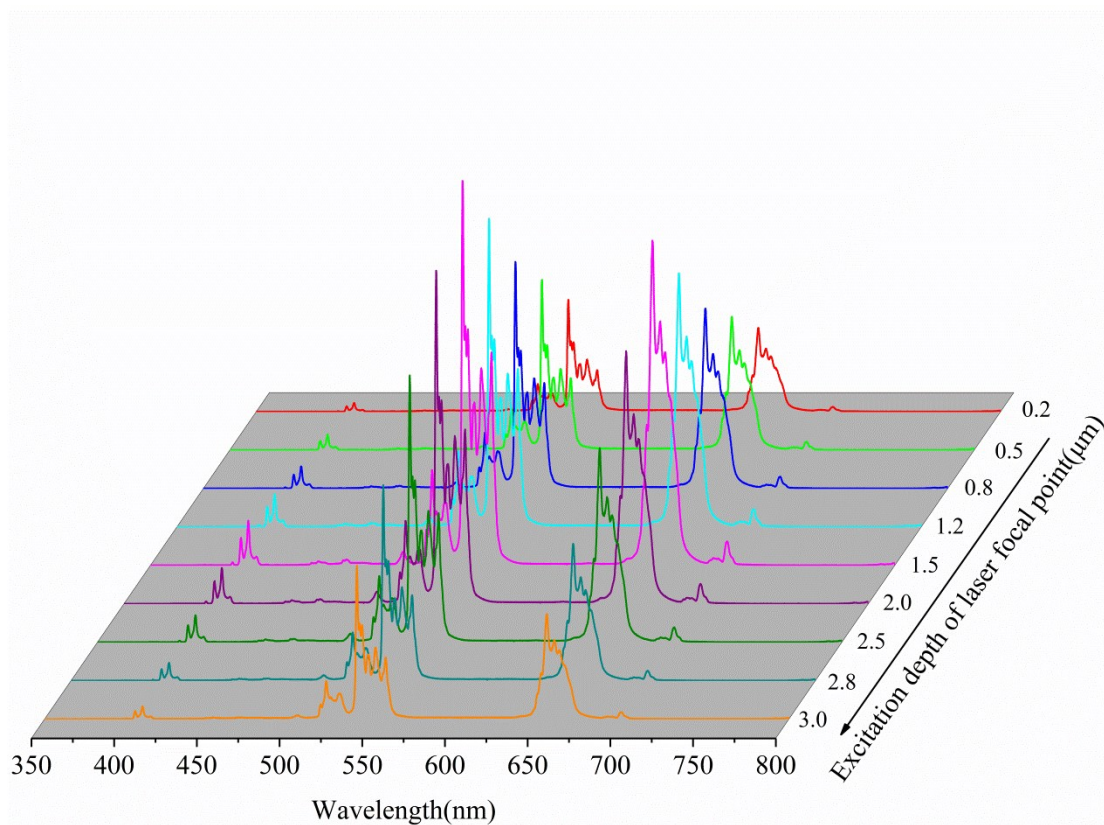

Fig. S3 Excitation depth-dependent UC emission spectra in a single short NaYF<sub>4</sub>: Yb<sup>3+</sup>/Er<sup>3+</sup> microrod excited with a 980-nm laser, the laser power is 40 mW/cm<sup>2</sup>.
